# Supplementary material for: An acid-treated reduced graphene oxide/Mn3O4 nanorod nanocomposite as an enhanced anode material for lithium ion batteries
Source: Royal Society of Chemistry journal article supplement (doi:10.1039/c7ra06396b), 2017-01-01
Supplement: c7ra06396b1.pdf [file c7ra06396b1.pdf]

## Supplementary Information

### Acid-treated Reduced Graphene Oxides/Mn<sub>3</sub>O<sub>4</sub> Nanorods Nanocomposite as an Enhanced Anode Material for Lithium Ion Batteries

Chae-Yong Seong,<sup>a</sup> Seung-Keun Park,<sup>b</sup> Youngkuk Bae,<sup>a</sup> Suyeon Yoo,<sup>a</sup> Yuanzhe Piao<sup>a,c,\*</sup>

<sup>a</sup> Program in Nano Science and Technology, Graduate School of Convergence Science and Technology, Seoul National University, 145 Gwanggyo-ro, Yeongtong-gu, Suwon-si, Gyeonggi-do, 443-270, Republic of Korea.

<sup>b</sup> Department of Materials Science and Engineering, Korea University, Anam-Dong, Seongbuk-Gu, Seoul 136-713, Republic of Korea

<sup>c</sup> Advanced Institutes of Convergence Technology, 145 Gwanggyo-ro, Yeongtong-gu, Suwon-si, Gyeonggi-do, 443-270, Republic of Korea.

\*Corresponding author, **E-mail:** parkat9@snu.ac.kr (**Prof. Yuanzhe Piao**)

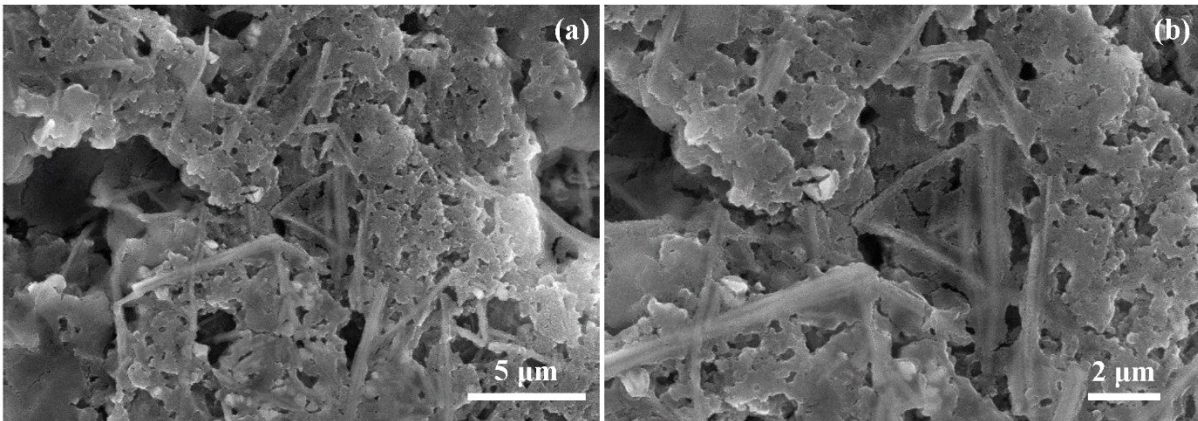

**Fig. S1** SEM images of the ArGO/Mn<sub>3</sub>O<sub>4</sub> NR after 100 cycles.

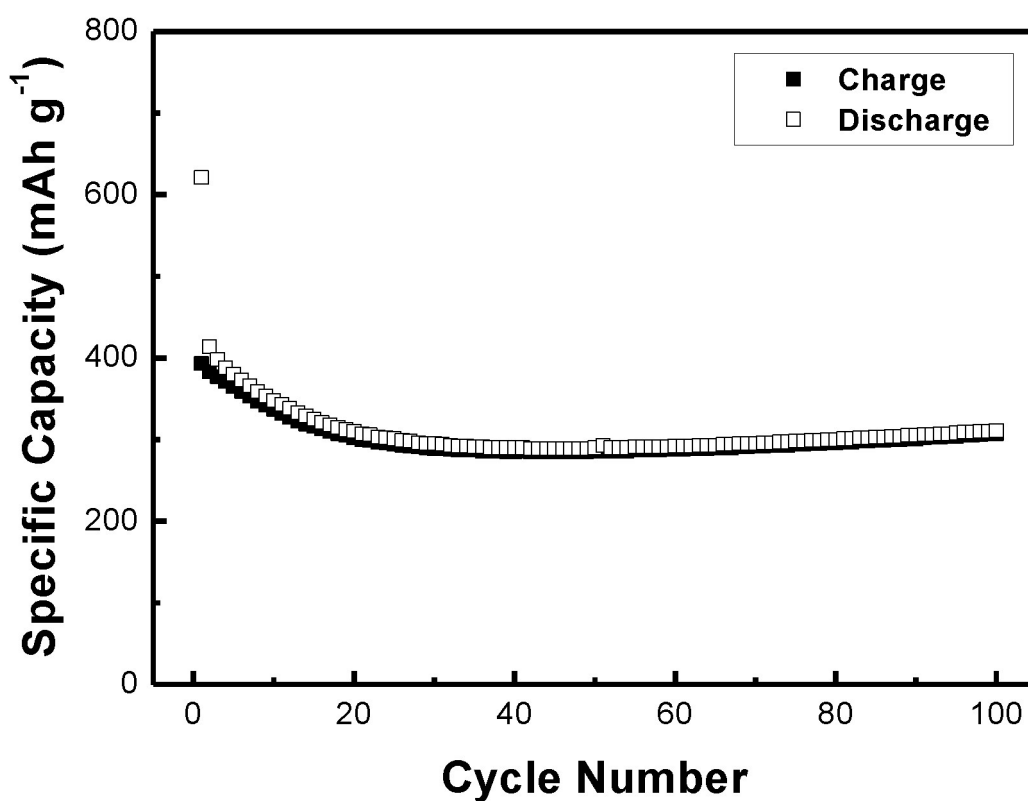

Fig. S2 Cycle performance of ArGO at a current density of 200 mA g<sup>-1</sup>.

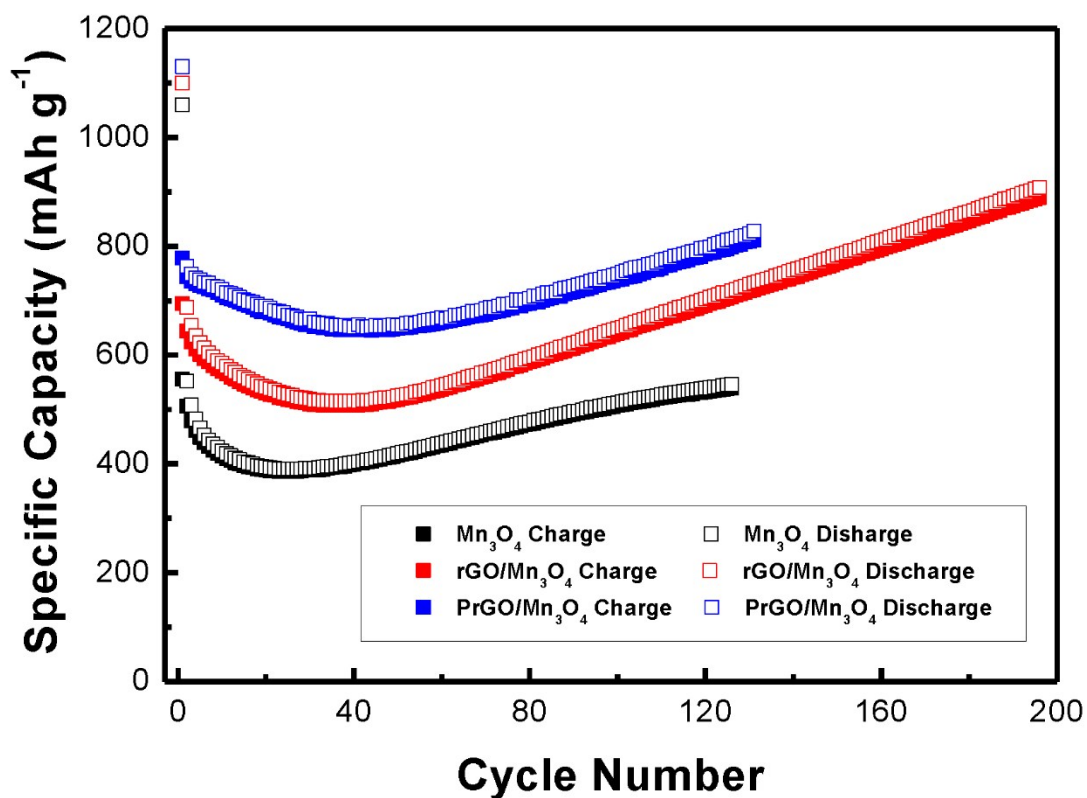

Fig. S3 Comparative cycle performance of Mn<sub>3</sub>O<sub>4</sub> NR, rGO/Mn<sub>3</sub>O<sub>4</sub> NR and ArGO/Mn<sub>3</sub>O<sub>4</sub> NR.

*The areal loading of the active materials*

$$= \frac{0.7 (\text{Total electrode weight} - \text{Cu weight})}{0.95} \text{mg} \cdot \text{cm}^{-2}$$

Mn<sub>3</sub>O<sub>4</sub> electrode : 0.54 mg/cm<sup>2</sup>

rGO/Mn<sub>3</sub>O<sub>4</sub> electrode : 0.50 mg/cm<sup>2</sup>

ArGO/Mn<sub>3</sub>O<sub>4</sub> electrode : 0.56 mg/cm<sup>2</sup>
